# Supplementary material for: In situ morphological transformation and investigation of electrocatalytic properties of cobalt oxide nanostructures toward oxygen evolution
Source: Royal Society of Chemistry journal article supplement (doi:10.1039/c6ce00796a), 2016-01-01
Supplement: c6ce00796a1.pdf [file c6ce00796a1.pdf]

## Supporting Information

### **In-situ morphological transformation and investigation of electrocatalytic properties of cobalt oxide nanostructures toward oxygen evolution**

*Sung-Fu Hung,<sup>a</sup> Ching-Wei Tung,<sup>a</sup> Ting-Shan Chan,<sup>b,\*</sup> Hao Ming Chen<sup>a,\*</sup>*

<sup>a</sup>Department of Chemistry, National Taiwan University, Taipei 106, Taiwan.

<sup>b</sup>National Synchrotron Radiation Research Center, Hsinchu 300, Taiwan.

#### **Experimental Section**

*S1. Fabrication of cobalt oxide nano-needles on nickel foam and the morphological transformation of cobalt oxide*

Co<sub>3</sub>O<sub>4</sub> nano-needles were grown on nickel foam by means of chemical bath deposition and post-calcination.<sup>1</sup> In the deposition, the nickel foam, which was cleaned ultrasonically in acetone and subsequently ethanol, was suspended perpendicularly with an immersed area of 1 cm<sup>2</sup> in a sample vial at 90 °C for 3 hours. The typical precursor solution in the synthesis contained the mixture of 0.625 g of urea in 9.5 mL of deionized water and 0.5 mL of 3 M Co(NO<sub>3</sub>)<sub>2(aq)</sub>. After reaction, the obtained precursor film was rinsed thoroughly with deionized water and further calcinated at 300 °C for 2 hours with the heating rate of 2 °C/min. In order to investigate the morphological variation, the solutions of 3 M transition metal nitrate (Ni(NO<sub>3</sub>)<sub>2</sub>, Cu(NO<sub>3</sub>)<sub>2</sub>, Zn(NO<sub>3</sub>)<sub>2</sub>) were introduced into the reaction solution.

## ***S2. Characterization***

The morphologies and elemental analysis were investigated with field-emission scanning electron microscopy (FE-SEM, JEOL JSM-6700F) equipped energy dispersive X-ray spectroscopy (EDX, Oxford Instrument XMax 150 mm<sup>2</sup>). The crystal structure was detected with X-ray diffractometer (XRD, Bruker D2 phaser). Selected area electron diffraction, energy dispersive X-ray spectroscopy, and high-resolution transmission electron microscopy images were characterized by TEM, JEOL JEM-2100F.

## ***S3. Electrochemical measurements***

Electrochemical properties were investigated on Bio-logic VSP potentiostat in a standard three-electrode setup using electrocatalyst modified nickel foam as the working electrode, a platinum plate as the counter electrode and a saturated calomel electrode (SCE) as the reference electrode. Aqueous solution of 1.0 M KOH (pH = 13.6) was used as the electrolyte. The potentials were converted to values relative to RHE based on the following equation:  $E_{\text{RHE}} = E_{\text{SCE}} + 0.0591 \times \text{pH} + E^0_{\text{SCE}}$ , where  $E^0_{\text{SCE}}$  is the standard potential of SCE relative to SHE at 25 °C (0.240 V). The working area of electrodes was fixed at 1 cm<sup>2</sup> for each experiment. Linear sweep voltammetry for oxygen evolution was collected at the scan rate of 1 mV/s with iR-correction. The electrochemical active surface area (ECSA) was measured from double-layer capacitance using cyclic voltammetry in a small potential range (0.25 V to 0.30 V vs. SCE), from which the double layer capacitance was determined from the slope of capacitive current at the midpoint of the scan range (0.275 V vs. SCE) versus

the scan rate according to  $C_{dl} = I_{cap} / (dE/dt)$ , where  $C_{dl}$  is the double layer capacitance and  $dE/dt$  is the scan rate. ECSA was calculated through dividing the average specific capacitance of  $40 \mu\text{F}/\text{cm}^2$  for transition metal oxide in 1 M alkaline solution). Electrochemical impedance spectroscopy (EIS) measurements were performed in a frequency range from 0.1 to  $10^4$  Hz with AC amplitude of 10 mV under applied bias range from 0.4 V to 0.6 V versus SCE with a scan step of 20 mV.

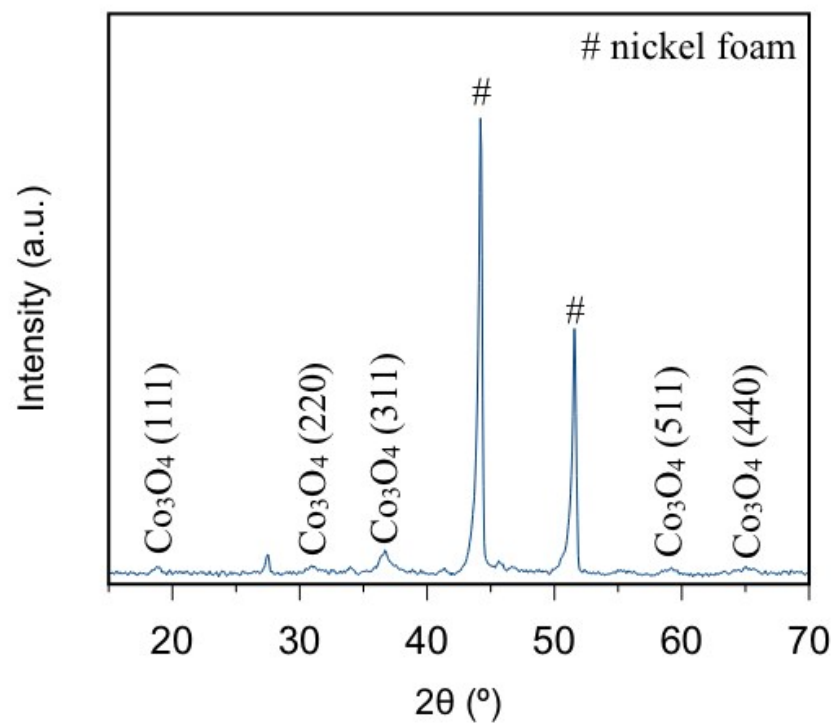

**Fig. S1.** X-ray diffraction patterns of Co<sub>3</sub>O<sub>4</sub> nano-needles on nickel foam.

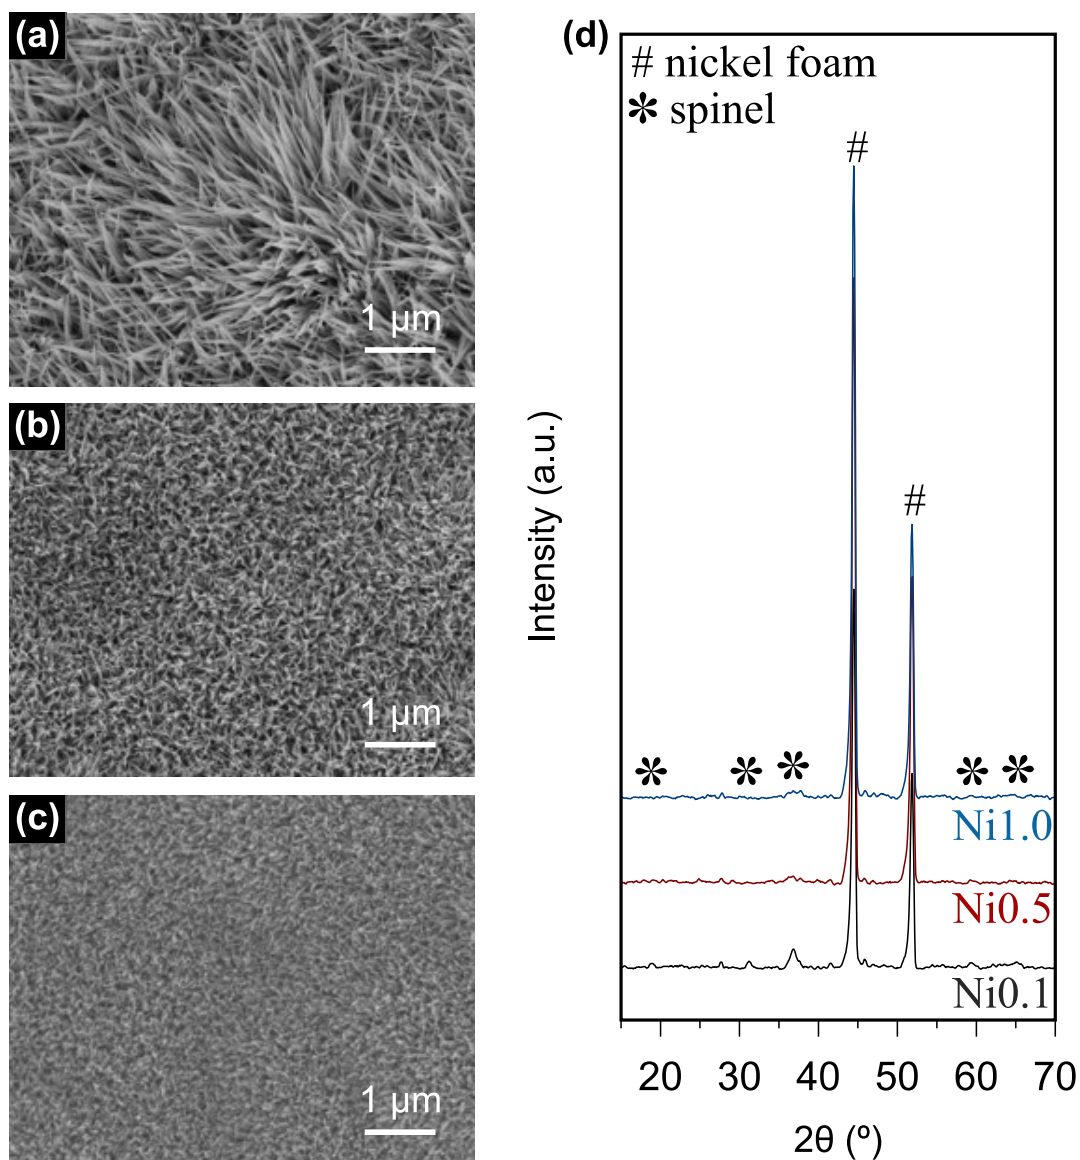

**Fig. S2.** Microstructure image of Ni-doping  $\text{Co}_3\text{O}_4$  nano-blanket: The introduction of (a) 0.015 M  $\text{Ni}(\text{NO}_3)_2$  (Ni0.1), (b) 0.075 M  $\text{Ni}(\text{NO}_3)_2$  (Ni0.5), (c) 0.15 M  $\text{Ni}(\text{NO}_3)_2$  (Ni1.0), and the corresponding X-ray diffraction patterns. The lattice constant of cobalt oxide is 8.169 Å (a-axis) (referring to JCPDS #80-1545) while that of nickel oxide is 8.353 Å (a-axis) (referring to JCPDS #89-5881), so that solid solution still existed even when the content of nickel became higher.

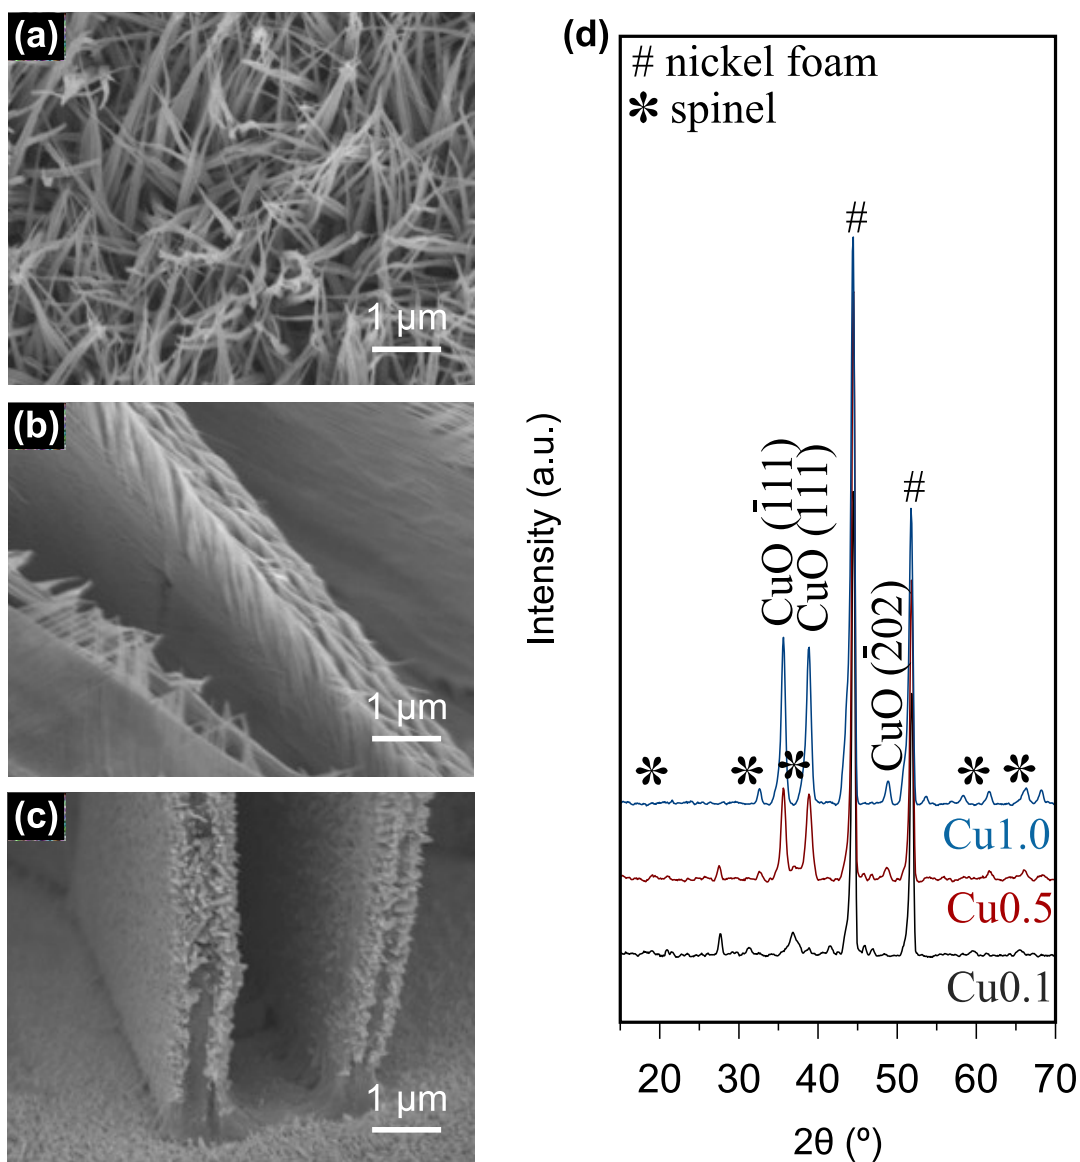

**Fig. S3.** Microstructure image of Cu-based  $\text{Co}_3\text{O}_4$  micro-plates: The introduction of (a) 0.015 M  $\text{Cu}(\text{NO}_3)_2$  (Cu0.1), (b) 0.075 M  $\text{Cu}(\text{NO}_3)_2$  (Cu0.5), (c) 0.15 M  $\text{Cu}(\text{NO}_3)_2$  (Cu1.0), and the corresponding X-ray diffraction patterns. The lattice constant of cobalt oxide is 8.169 Å (a-axis) (referring to JCPDS #80-1545) while that of copper oxide is 4.689 Å (a-axis), 3.420 Å (b-axis), and 5.130 Å (c-axis) (referring to JCPDS #89-5899), resulting in the fact that phase separation would be detected when the contents of copper in the nanostructures were higher.

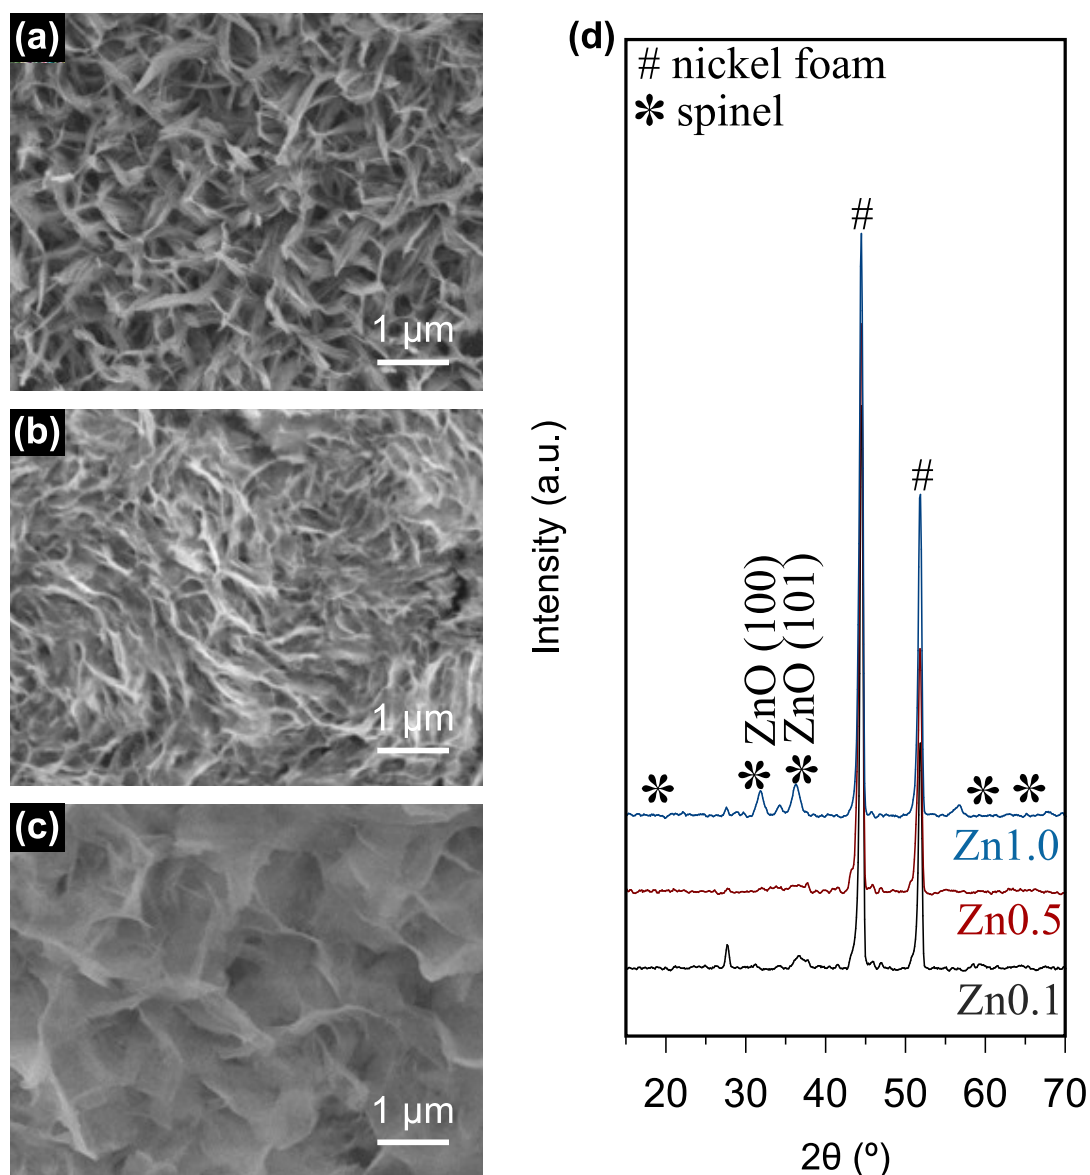

**Fig. S4.** Microstructure image of Zn-doped  $\text{Co}_3\text{O}_4$  nano-sheets: The introduction of (a) 0.015 M  $\text{Zn}(\text{NO}_3)_2$  ( $\text{Zn0.1}$ ), (b) 0.075 M  $\text{Zn}(\text{NO}_3)_2$  ( $\text{Zn0.5}$ ), (c) 0.15 M  $\text{Zn}(\text{NO}_3)_2$  ( $\text{Zn1.0}$ ), and the corresponding X-ray diffraction patterns. The lattice constant of cobalt oxide is 8.169 Å (a-axis) (referring to JCPDS #80-1545) while that of zinc oxide is 3.253 Å (a-axis) and 5.213 Å (c-axis) (referring to JCPDS #89-1397), leading to the fact that phase separation would be detected when the contents of zinc in the nanostructures were higher.

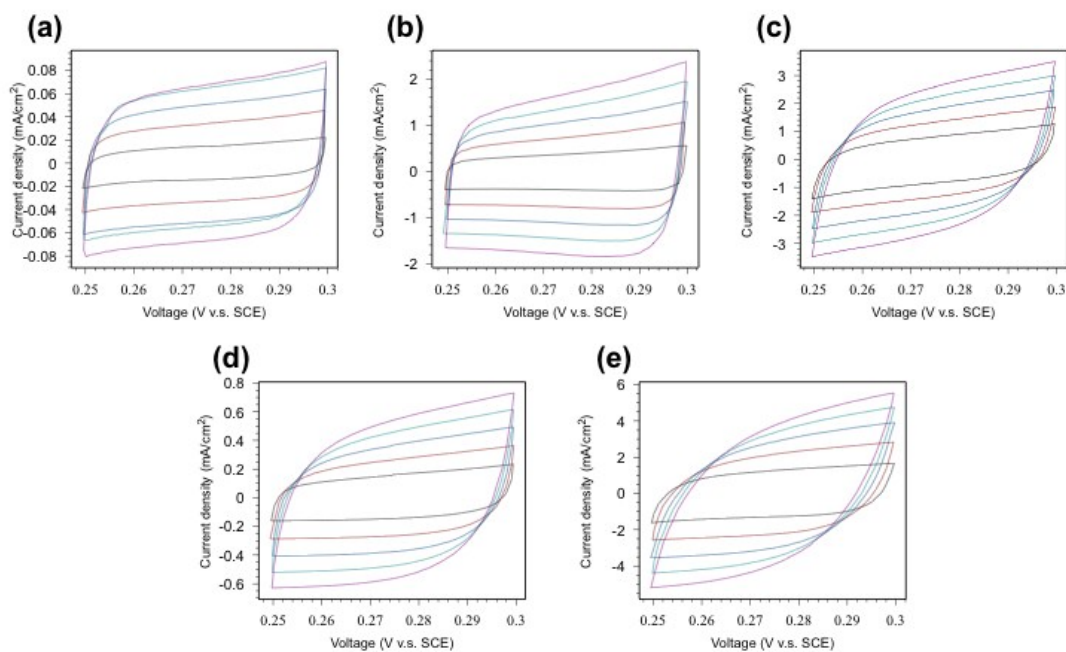

**Fig. S5.** Cyclic voltammograms in the double layer region at scan rate of 2 mV/s (black line), 4 mV/s (red line), 6 mV/s (blue line), 8 mV/s (green line), and 10 mV/s (purple line) for (a) nickel foam, (b) Co<sub>3</sub>O<sub>4</sub> nano-needles, (c) Ni-doped Co<sub>3</sub>O<sub>4</sub> nano-blanket, (d) Cu-based Co<sub>3</sub>O<sub>4</sub> micro-plates, and (e) Zn-doped Co<sub>3</sub>O<sub>4</sub> nano-sheets.

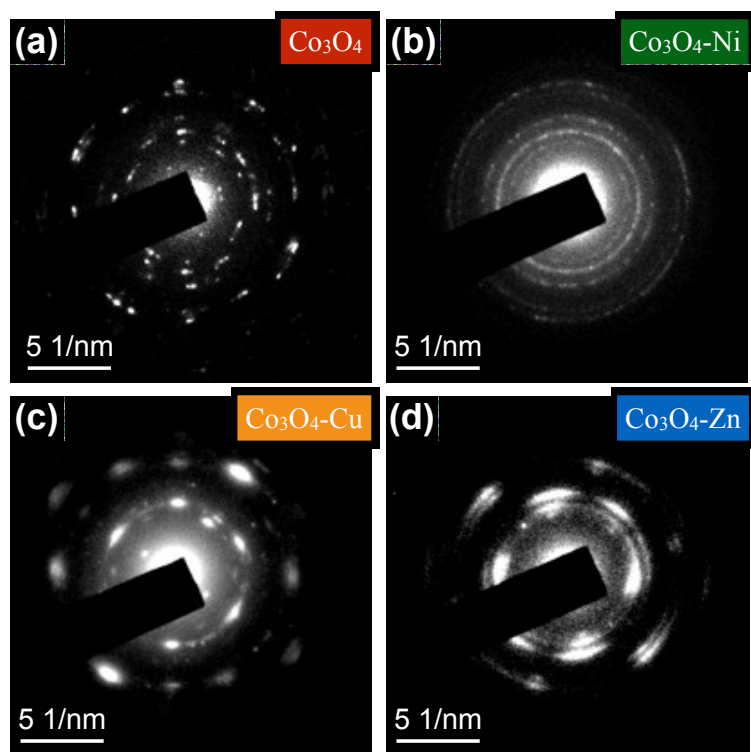

**Fig. S6.** Selected area electron diffraction for (a)  $\text{Co}_3\text{O}_4$  nano-needles (b) Ni-doped  $\text{Co}_3\text{O}_4$  nano-blanket (c) Cu-based  $\text{Co}_3\text{O}_4$  micro-plates (d) Zn-doped  $\text{Co}_3\text{O}_4$  nano-sheets. Note that there were the bright spots in the pattern of Cu-based  $\text{Co}_3\text{O}_4$  micro-plates, which belonged to the pattern of CuO with single crystal and was consistent with the result of XRD.

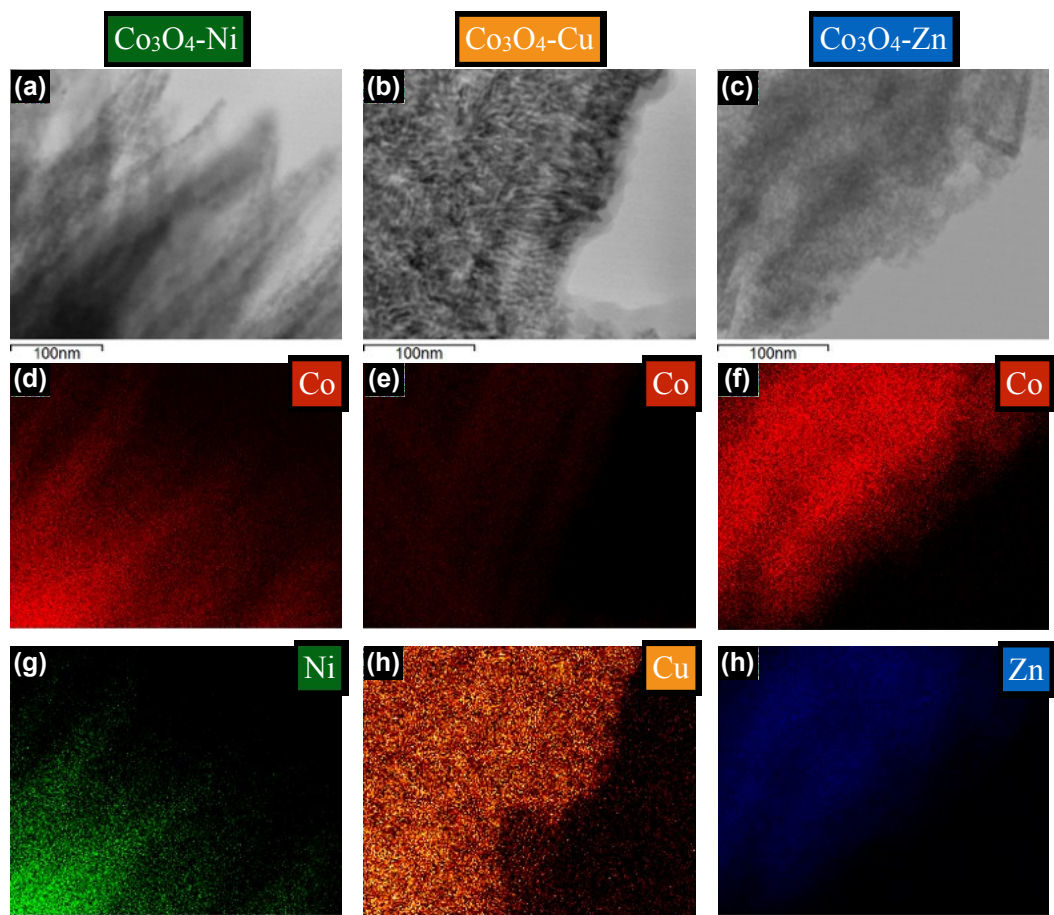

**Fig. S7.** TEM images of (a) Ni-doped  $\text{Co}_3\text{O}_4$  nano-blanket (b) Cu-based  $\text{Co}_3\text{O}_4$  micro-plates (c) Zn-doped  $\text{Co}_3\text{O}_4$  nano-sheets and the corresponding EDX mapping of each element: (d) Co and (g) Ni for Ni-doped  $\text{Co}_3\text{O}_4$  nano-blanket; (e) Co and (h) Cu for Cu-based  $\text{Co}_3\text{O}_4$  micro-plates; (f) Co and (h) Zn for Zn-doped  $\text{Co}_3\text{O}_4$  nano-sheets.

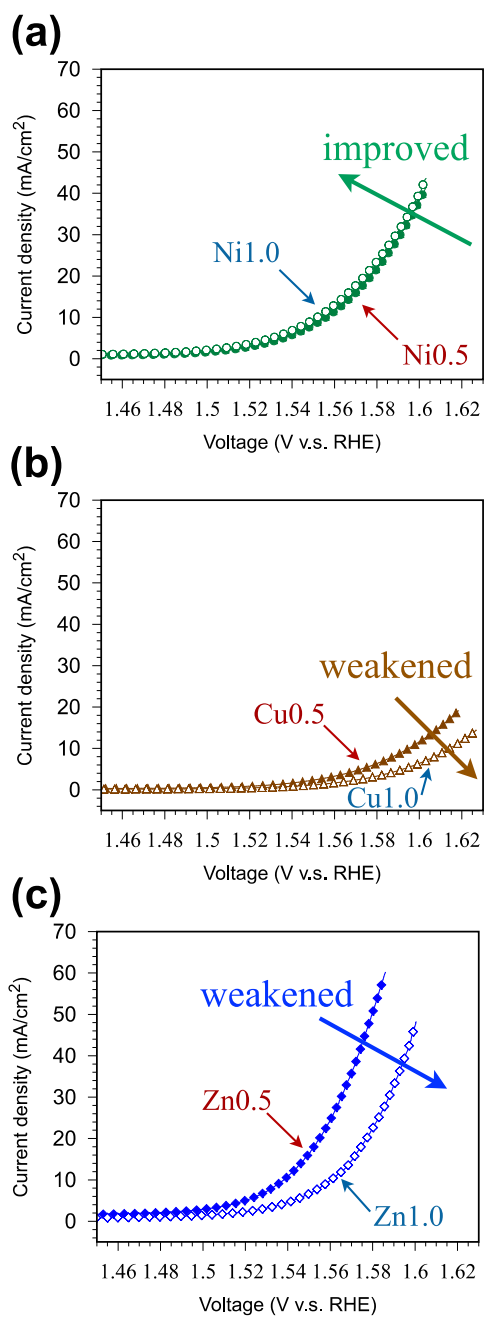

**Fig. S8.** The comparison of electrochemical activities of cobalt oxide nanostructures with different doping amounts by introducing transition metal nitrates with different concentrationfor oxygen evolution reaction: (a) for nickel, (b) copper, and (c) zinc dopants.

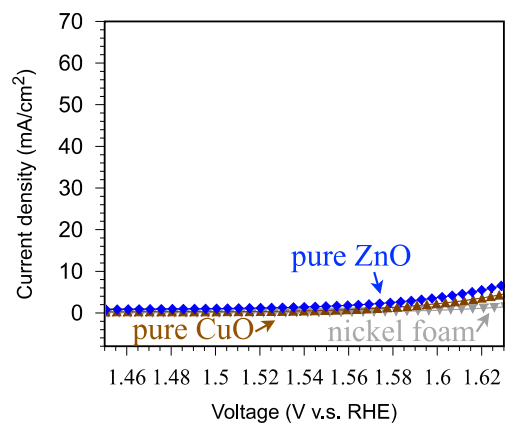

**Fig. S9.** The electrochemical activities of pure zinc oxide and copper oxide for oxygen evolution reaction, which was conducted by similar chemical bath deposition without introducing cobalt nitrate in the solution.

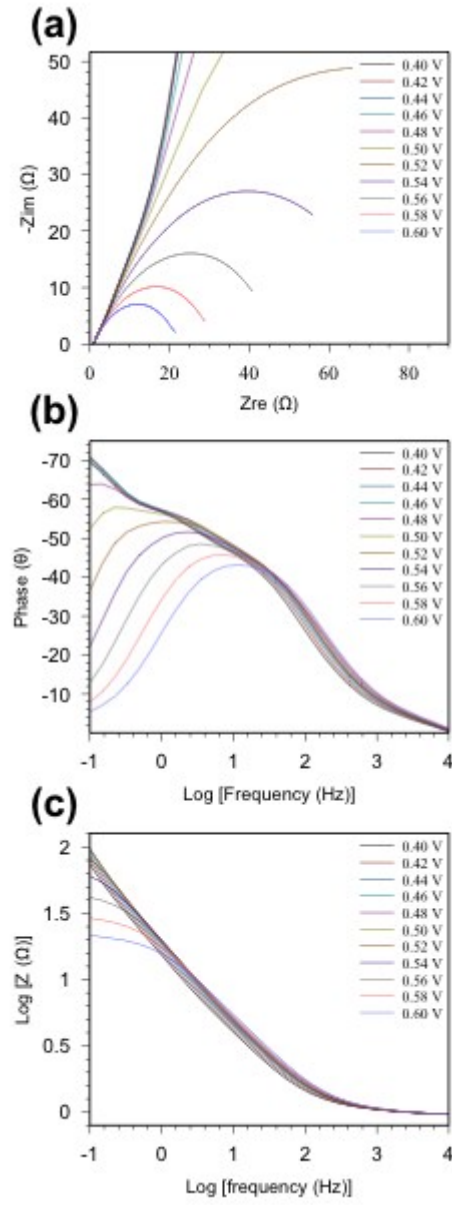

**Fig. S10.** The electron impedance spectroscopy (EIS) measurement for nickel foam: (a) Nyquist plot, (b) Bode plot, and (c) Bode plot- $|Z|$ .

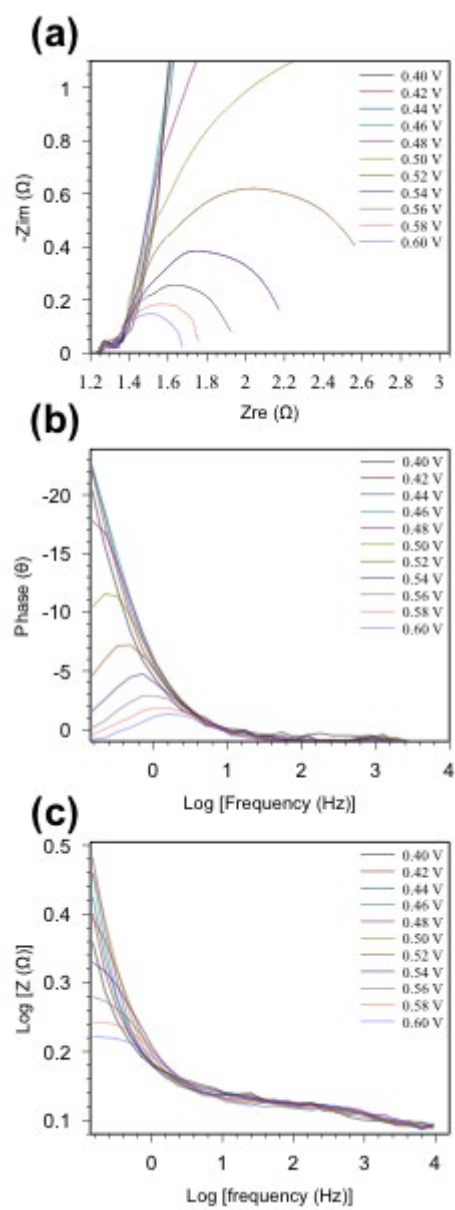

**Fig. S11.** The electron impedance spectroscopy (EIS) measurement for  $\text{Co}_3\text{O}_4$  nano-needles: (a) Nyquist plot, (b) Bode plot, and (c) Bode plot- $|Z|$ .

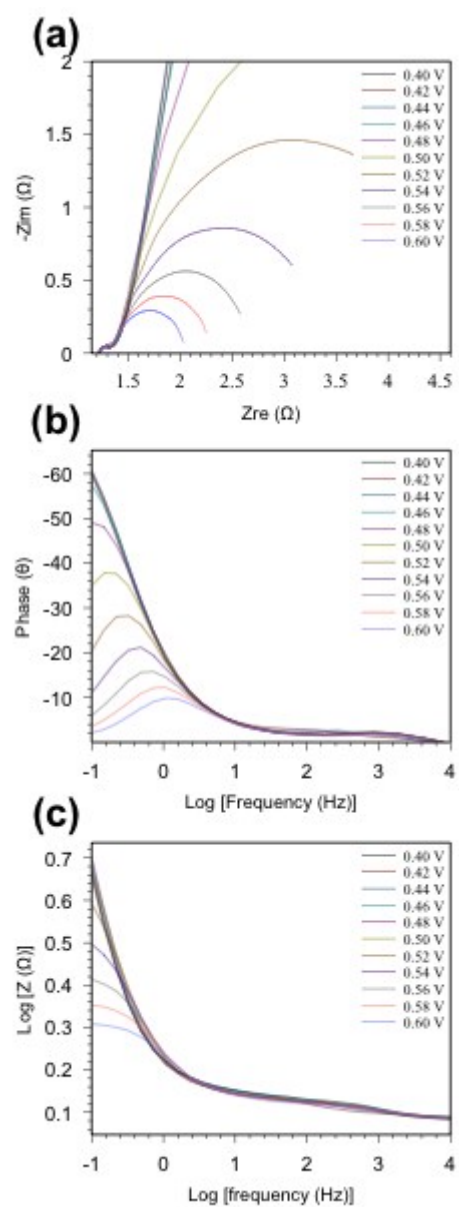

**Fig. S12.** The electron impedance spectroscopy (EIS) measurement for Ni-doped  $\text{Co}_3\text{O}_4$  nano-blanket: (a) Nyquist plot, (b) Bode plot, and (c) Bode plot- $|Z|$ .

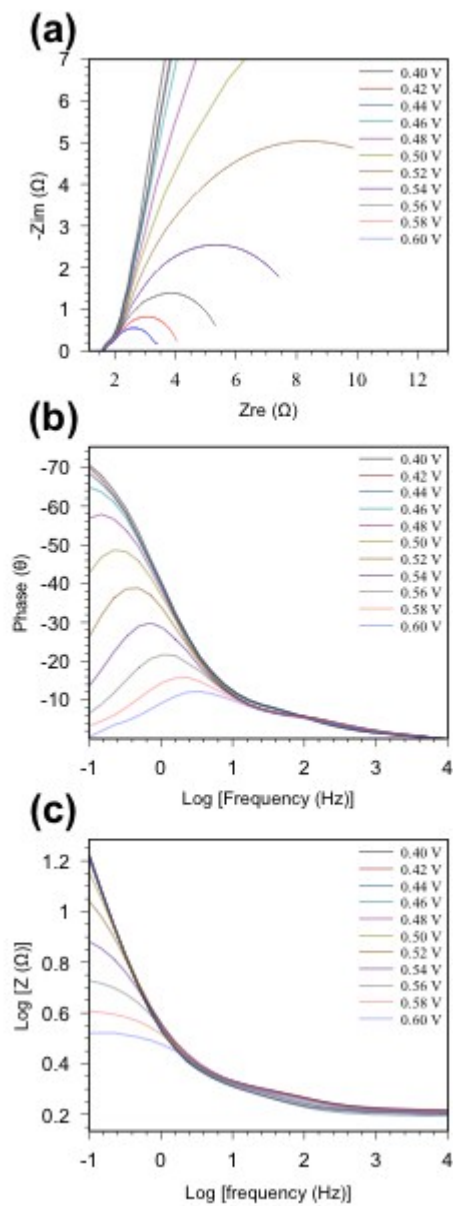

**Fig. S13.** The electron impedance spectroscopy (EIS) measurement for Cu-based  $\text{Co}_3\text{O}_4$  micro-plates: (a) Nyquist plot, (b) Bode plot, and (c) Bode plot- $|Z|$ .

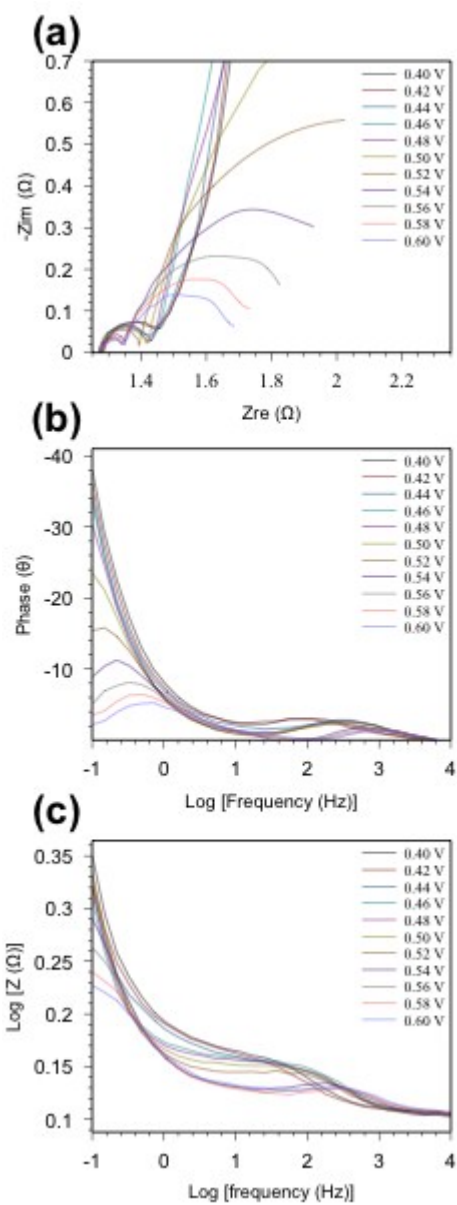

**Fig. S14.** The electron impedance spectroscopy (EIS) measurement for Zn-doped  $\text{Co}_3\text{O}_4$  nano-sheets: (a) Nyquist plot, (b) Bode plot, and (c) Bode plot- $|Z|$ .

**Table S1.** Comparison of over-potential, tafel slope, and roughness factor for various cobalt oxide-based nanostructures.

|                                    | Nanostructure | $\eta_{j10}$<br>(mV) | tafel slope<br>(mVdec <sup>-1</sup> ) | R <sub>f</sub> | reference |
|------------------------------------|---------------|----------------------|---------------------------------------|----------------|-----------|
| Co <sub>3</sub> O <sub>4</sub>     | nano-needles  | 315                  | 58.7                                  | 4243           | this work |
|                                    | nano-pillars  | 440                  | 43                                    | 1292           | 2         |
|                                    | nano-rods     | 450                  | 64                                    | 230            | 3         |
|                                    | nano-wires    | 320                  | 72                                    | 7658           | 4         |
|                                    | nano-plates   | 440                  | 71                                    | n/a            | 5         |
| Co <sub>3</sub> O <sub>4</sub> -Ni | nano-blackets | 322                  | 73.3                                  | 5523           | this work |
|                                    | nano-sheets   | 340                  | 51                                    | 680            | 3         |
|                                    | nano-wires    | >370                 | 64                                    | 3400           | 6         |
|                                    | nano-sponges  | 362                  | 64.4                                  | n/a            | 7         |
|                                    | nano-cages    | 340                  | 88                                    | n/a            | 8         |
|                                    | nano-plates   | 450                  | n/a                                   | n/a            | 9         |
| Co <sub>3</sub> O <sub>4</sub> -Cu | micro-plates  | 365                  | 72.3                                  | 1248           | this work |
|                                    | nano-spheres  | 410                  | n/a                                   | n/a            | 10        |
|                                    | nanoparticles | 400                  | 67                                    | 26             | 11        |
|                                    | nanoparticles | >470                 | 63                                    | n/a            | 12        |
| Co <sub>3</sub> O <sub>4</sub> -Zn | nano-sheets   | 308                  | 57.2                                  | 7915           | this work |
|                                    | nano-pillars  | 320                  | 51                                    | 2512           | 2         |
|                                    | nano-arrays   | 350                  | n/a                                   | n/a            | 9         |
|                                    | thin film     | 390                  | 46                                    | n/a            | 13        |

## References

- 1 C.-W. Kung, H.-W. Chen, C.-Y. Lin, K.-C. Huang, R. Vittal and K.-C. Ho, *ACS Nano*, 2012, **6**, 7016–7025.
- 2 X. Liu, Z. Chang, L. Luo, T. Xu, X. Lei, J. Liu and X. Sun, *Chem. Mater.*, 2014, **26**, 1889–1895.
- 3 H.-Y. Wang, Y.-Y. Hsu, R. Chen, T.-S. Chan, H. M. Chen and B. Liu, *Adv. Energy Mater.*, 2015, **5**, 1500091.

- 4 P. Chen, K. Xu, Z. Fang, Y. Tong, J. Wu, X. Lu, X. Peng, H. Ding, C. Wu and Y. Xie, *Angew. Chem. Int. Ed.*, 2015, **54**, 14710–14714.
- 5 X. Zhou, Z. Xia, Z. Tian, Y. Ma and Y. Qu, *J. Mater. Chem. A*, 2015, **3**, 8107–8114.
- 6 Y. Li, P. Hasin and Y. Wu, *Adv. Mater.*, 2010, **22**, 1926–1929.
- 7 C. Zhu, D. Wen, S. Leubner, M. Oschatz, W. Liu, M. Holzschuh, F. Simon, S. Kaskel and A. E. X. Iler, *Chem. Commun.*, 2015, **51**, 7851–7854.
- 8 H. Hu, B. Guan, B. Xia and X. W. D. Lou, *J. Am. Chem. Soc.*, 2015, **137**, 5590–5595.
- 9 X. Zhang, J. Zhang and K. Wang, *ACS Appl. Mater. Interfaces*, 2015, **7**, 21745–21750.
- 10 A. Serov, N. I. Andersen, A. J. Roy, I. Matanovic, K. Artyushkova and P. Atanasov, *J. Electrochem. Soc.*, 2015, **162**, F449–F454.
- 11 S. K. Bikkarolla and P. Papakonstantinou, *J. Power Sources*, 2015, **281**, 243–251.
- 12 X. Wu and K. Scott, *J. Mater. Chem.*, 2011, **21**, 12344.
- 13 T. W. Kim, M. A. Woo, M. Regis and K.-S. Choi, *J. Phys. Chem. Lett.*, 2014, **5**, 2370–2374.
